# Supplementary material
Source: PubMed Central journal article supplement (PMC8508097)
Supplement: jb.00371-21-s0001.pdf [file jb.00371-21-s0001.pdf]

**Supplemental Table 1:** Bacterial strains used in this study

|       |                                                                                          |                      |
|-------|------------------------------------------------------------------------------------------|----------------------|
| V583  | Parental strain                                                                          | Clinical isolate (1) |
| IH06  | V583 $\Delta$ <i>ef0114</i>                                                              | (2)                  |
| AH03  | V583 $\Delta$ <i>ef0362-61</i>                                                           | (2)                  |
| AH01  | V583 $\Delta$ <i>ef2863</i>                                                              | (2)                  |
| AH09  | V583 $\Delta$ <i>ef0114\Delta</i> <i>ef0362-61\Delta</i> <i>ef2863</i> ( $\Delta$ TM)    | (2)                  |
| EK49  | V583 $\Delta$ <i>ef0114::ef0114</i>                                                      | This study           |
| EK50  | V583 $\Delta$ <i>ef0114\Delta</i> <i>ef0362-61\Delta</i> <i>ef2863::ef0114</i>           | This study           |
| AH03R | V583 $\Omega$ <i>ef0362-61</i>                                                           | (2)                  |
| EH01  | V583 $\Delta$ <i>ccpA</i>                                                                | (3)                  |
| VI70  | V583 $\Delta$ <i>ccpA\Delta</i> <i>ef0114</i>                                            | (2)                  |
| AH05  | V583 $\Delta$ <i>ccpA\Delta</i> <i>ef0362-61</i>                                         | (2)                  |
| AH10  | V583 $\Delta$ <i>ccpA\Delta</i> <i>ef2863</i>                                            | (2)                  |
| IH09  | V583 $\Delta$ <i>ccpA\Delta</i> <i>ef0114\Delta</i> <i>ef0362-61</i>                     | (2)                  |
| IH12  | V583 $\Delta$ <i>ccpA\Delta</i> <i>ef0362-61\Delta</i> <i>ef2863</i>                     | (2)                  |
| IH08  | V583 $\Delta$ <i>ccpA\Delta</i> <i>ef0114\Delta</i> <i>ef2863</i>                        | (2)                  |
| IH13  | V583 $\Delta$ <i>ccpA\Delta</i> <i>ef0114\Delta</i> <i>ef0362-61\Delta</i> <i>ef2863</i> | (2)                  |
| EK40  | V583 $\Delta$ <i>ccpA\Delta</i> <i>ef0114::ef0114</i>                                    | This study           |
| IH10  | V583 $\Delta$ <i>mptBACD</i>                                                             | (3)                  |
| EK02  | V583 $\Delta$ <i>ef1516</i>                                                              | (3)                  |
| IH10R | V583 $\Omega$ <i>mptBACD</i>                                                             | (3)                  |
| EK48  | V583 $\Delta$ <i>mptBACD\Delta</i> <i>ef1516</i>                                         | This study           |
| EK54  | V583 $\Delta$ <i>mptBACD\Delta</i> <i>ef1516::mptBACD</i>                                | This study           |
| EK55  | V583 $\Delta$ <i>mptBACD\Delta</i> <i>ef1516::ef1516</i>                                 | This study           |

---

|      |                                     |            |
|------|-------------------------------------|------------|
| SP27 | V583 $\Delta$ <i>ef1317</i>         | This study |
| EK47 | V583 $\Delta$ <i>ef1317::ef1317</i> | This study |
| ZA05 | V583 $\Delta$ <i>ef0466</i>         | This study |
| EK46 | V583 $\Delta$ <i>ef0466::ef0466</i> | This study |

---

### Supplementary References

1. Sahm DF, Kissinger J, Gilmore MS, Murray PR, Mulder R, Solliday J, Clarke B. 1989. In vitro susceptibility studies of vancomycin-resistant *Enterococcus faecalis*. *Antimicrob Agents Chemother* 33:1588-91.
2. Keffeler EC, Iyer VS, Henderson AJ, Huck IL, Schwarting N, Cortez A, Hancock LE. 2021. Activity of CcpA-regulated GH18 family glycosyl hydrolases that contribute to nutrient acquisition and fitness in *Enterococcus faecalis* *Infection and Immunity* (*in press*).
3. Keffeler EC, Iyer VS, Parthasarathy S, Ramsey MM, Gorman MJ, Barke TL, Varahan S, Olson S, Gilmore MS, Abdullahi ZH, Hancock EN, Hancock LE. 2021. Influence of the Alternative Sigma Factor RpoN on Global Gene Expression and Carbon Catabolism in *Enterococcus faecalis* V583. *mBio* 12.

**Supplemental Table 2:** Oligonucleotides used in this study

| <b>Primer</b> | <b>Sequence (5'-3')</b>              |
|---------------|--------------------------------------|
| EF0114P1      | GAGAGAATTCCGTGAAGTTACTGAACAAG        |
| EF0114P4      | GAGACTGCAGCTTGATTGACAGCTTCCAGC       |
| EF0114Up      | GATGGGAAGCCAGTAATAAGAG               |
| EF0114Down    | CGTGCTGGCATATAATTGACC                |
| MptBACDP1     | GAGAGAATTCCGAAGACTATGAAATTATTGCG     |
| MptBACDP4     | GAGACTGCAGCAGTCCATTCCATGATGTTGT      |
| MptBACDUp     | TAGACTGGCATTTAGAAGTGA                |
| MptBACDDown   | GCAATTCCTTCATACGATTACG               |
| EF1516P1      | GAGAGAATTCCAATGTGGTGTACAATGGTTAC     |
| EF1516P4      | CTCTGCATGCATCAGTTACATCCCTTCTAGT      |
| EF1516Up      | CGAGCACATATAAGTATGCCT                |
| EF1516Down    | GAAGGCCTAACTCTTTCTGCTT               |
| EF1317P1      | GAGAGAATTCCTTTCACCTATAAAGCCGATAAG    |
| EF1317P2      | TCTCGGATCCATG TTTTCATCTTCATCCTTCTTTC |
| EF1317P3      | GAGAGGATCCGCATAAGACACAAGAAAAGCTT     |
| EF1317P4      | TCTCCTGCAGCATCTTAGAAGCCAAAAGCCTT     |
| EF1317Up      | AGATACGGACTGGCAAAAATAT               |
| EF1317Down    | CTGTCAACACTCCTTATATGACG              |
| EF0466P1      | GAGAGAATTCGGTTGGAAATGACACACAAGAC     |
| EF0466P2      | GAGACTGCAGTGCATTTGCTACACGGATAATTTG   |
| EF0466P3      | GAGACTGCAGAACCATCAAGATGTTGTTGTA      |
| EF0466P4      | GAGAGCATGCCTTACTTATCACCTTTCTTCTAAC   |

---

EF0466Up

AGGTCGAACAGACAAGGTC

---

EF0466Down

GTGACCATTCTGCTTCGACTT

---

Underlined sequences depict restriction sites used for cloning purposes

**Supplemental Table 3:** Plasmids used in this study

| Plasmid | Description                                               | Reference  |
|---------|-----------------------------------------------------------|------------|
| pLT06   | Markerless exchange vector; chloramphenicol resistance    | (1)        |
| pEK09   | pLT06 + engineered <i>ef0114</i> complement               | This study |
| pEK04   | pLT06 + engineered <i>ef1516</i> deletion                 | (2)        |
| pEK68   | pLT06 + engineered <i>mptBACD</i> complement              | This study |
| pEK61   | pLT06 + engineered <i>ef1516</i> complement               | This study |
| pSP20   | pLT06 + engineered <i>ef1317</i> deletion                 | This study |
| pEK60   | pLT06 + engineered <i>ef1317</i> complement               | This study |
| pZA12   | pLT06 + engineered <i>ef0466</i> deletion                 | This study |
| pEK62   | pLT06 + engineered <i>ef0466</i> complement               | This study |
| pEK33   | pET21b + EF0114 (full length) + His6 overexpression       | (3)        |
| pEK34   | pET21b + EF0114 ( $\alpha$ ) + His6 overexpression        | (3)        |
| pEK36   | pET21b + EF0114 ( $\gamma$ ) + His6 overexpression        | (3)        |
| pEK37   | pET21b + EF0114 ( $\alpha+\beta$ ) + His 6 overexpression | (3)        |
| pEK38   | pET21b + EF0114 ( $\beta+\gamma$ ) + His6 overexpression  | (3)        |
| pEK47   | pET21b + EF0114 E186Q + His6 overexpression               | (3)        |
| pEK48   | pET21b + EF0114 E662Q + His6 overexpression               | (3)        |

**Supplementary References**

1. Thurlow LR, Thomas VC, Fleming SD, Hancock LE. 2009. *Enterococcus faecalis* capsular polysaccharide serotypes C and D and their contributions to host innate immune evasion. *Infection and Immunity* 77.
2. Keffeler EC, Iyer VS, Parthasarathy S, Ramsey MM, Gorman MJ, Barke TL, Varahan S, Olson S, Gilmore MS, Abdullahi ZH, Hancock EN, Hancock LE. 2021. Influence of the Alternative Sigma Factor RpoN on Global Gene Expression and Carbon Catabolism in *Enterococcus faecalis* V583. *mBio* 12.

3. Keffeler EC, Iyer VS, Henderson AJ, Huck IL, Schwarting N, Cortez A, Hancock LE. 2021. Activity of CcpA-regulated GH18 family glycosyl hydrolases that contribute to nutrient acquisition and fitness in *Enterococcus faecalis* Infection and Immunity (*in press*).
